# Supplementary material for: Nanoscale kinetics of amorphous calcium carbonate precipitation in H2O and D2O
Source: Royal Society of Chemistry journal article supplement (doi:10.1039/d0cp03032e), 2020-01-01
Supplement: d0cp03032e1.pdf [file d0cp03032e1.pdf]

Supporting Information for  
Nanoscale Kinetics of Amorphous Calcium Carbonate Precipitation in H<sub>2</sub>O and D<sub>2</sub>O

Peter D. Morris<sup>†</sup>, Ian J. McPherson<sup>†\*</sup>, Gabriel N. Meloni and Patrick R. Unwin<sup>\*</sup>  
Department of Chemistry, University of Warwick, Coventry, CV4 7AL  
<sup>\*</sup>E-mail: [ian.mcpherson@warwick.ac.uk](mailto:ian.mcpherson@warwick.ac.uk), [p.r.unwin@warwick.ac.uk](mailto:p.r.unwin@warwick.ac.uk)

**Contents**

|     |                                                                                                                                |     |
|-----|--------------------------------------------------------------------------------------------------------------------------------|-----|
| S1. | Repeatability of induction time between runs.....                                                                              | S2  |
| S2. | Preparation of H <sub>2</sub> O and D <sub>2</sub> O solutions of equivalent CO <sub>3</sub> <sup>2-</sup> concentration ..... | S3  |
| S3. | STEM images of Nanopipettes .....                                                                                              | S4  |
| S4. | Raman spectrum of nanopipette after precipitation .....                                                                        | S8  |
| S5. | Evaluation of the role of mass transport control in precipitation .....                                                        | S9  |
| S6. | Induction time data.....                                                                                                       | S11 |
| S7. | Finite element method simulation of nanopipette mass transport.....                                                            | S12 |
| S8. | References.....                                                                                                                | S17 |

## S1. Repeatability of induction time between runs

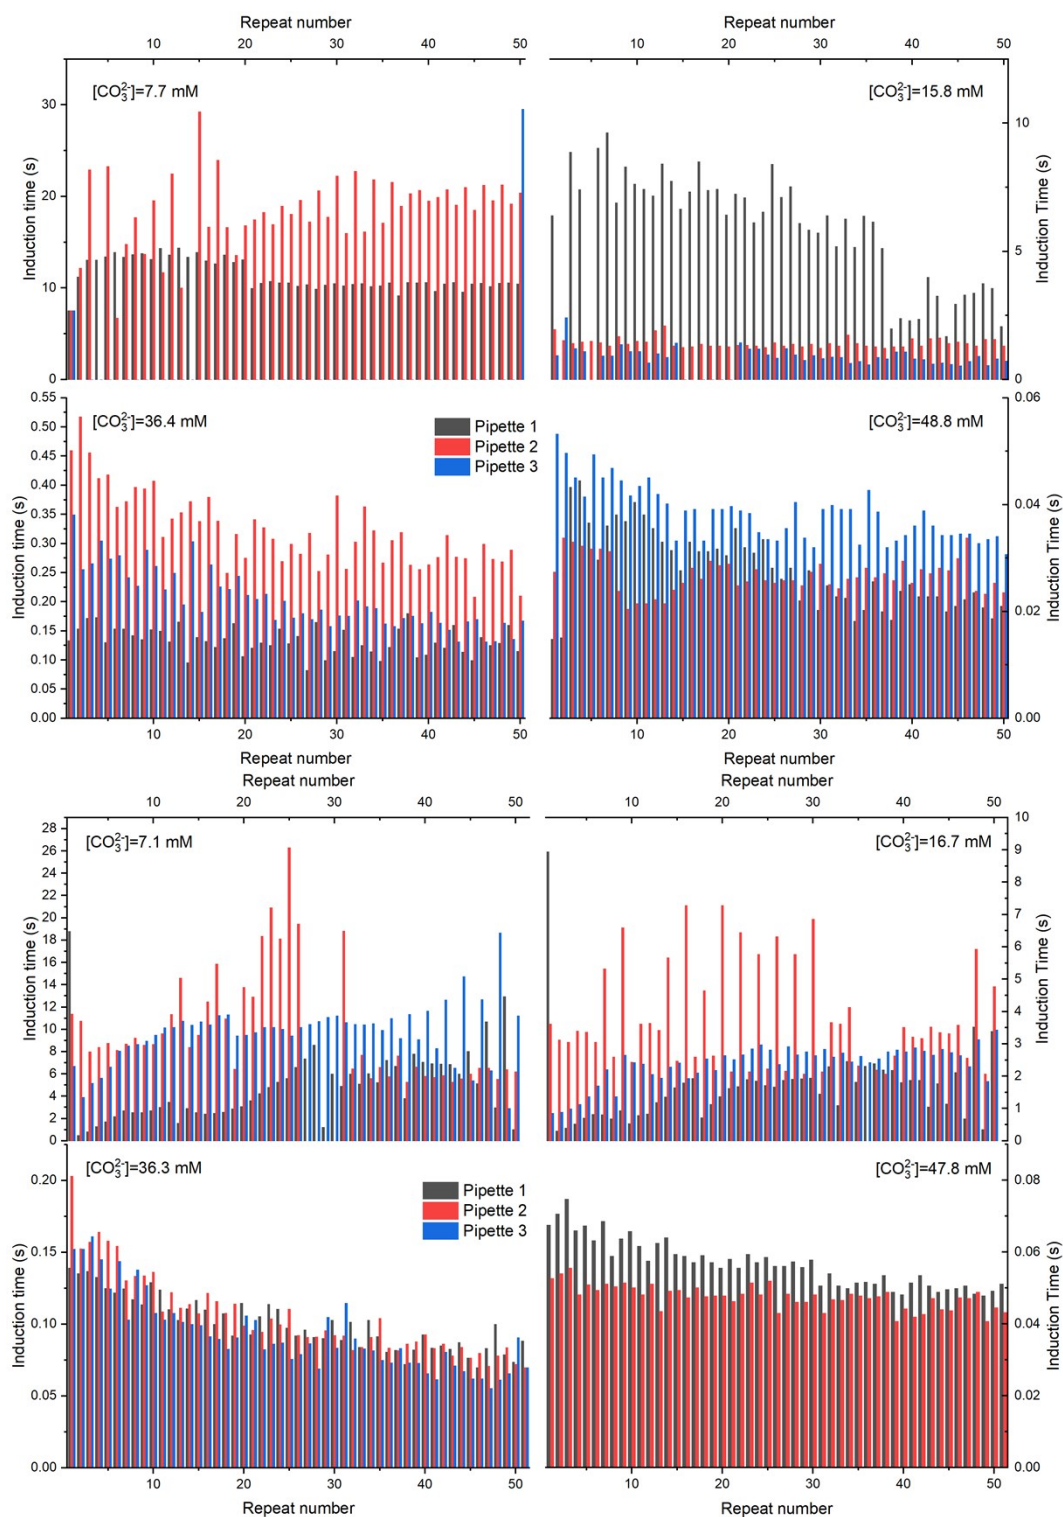

Figure S1: Induction times measured in H<sub>2</sub>O (top 4 panels) and D<sub>2</sub>O (bottom 4 panels) solutions. Data from the 3 replicate nanopipettes is shown (black, red, blue bars). One pipette at 7.7 mM CO<sub>3</sub><sup>2-</sup> in H<sub>2</sub>O and 47.8 mM CO<sub>3</sub><sup>2-</sup> in D<sub>2</sub>O failed to block entirely and so limited data is shown for these runs. Very occasionally no blocking event occurred on the timescale of a repetition and this is represented as an induction time of 0 s (but not included in any descriptive statistics).

## S2. Preparation of H<sub>2</sub>O and D<sub>2</sub>O solutions of equivalent CO<sub>3</sub><sup>2-</sup> concentration

To enable comparison of nucleation rates in H<sub>2</sub>O and D<sub>2</sub>O solutions effort was made to ensure the CO<sub>3</sub><sup>2-</sup> concentration in each solution was comparable. Uncertainty surrounding the use of glass electrodes to make pH measurements prompted Raman spectroscopy to be explored as an alternative method for estimating the CO<sub>3</sub><sup>2-</sup> concentration during solution preparation. The spectra of aqueous solutions of CO<sub>3</sub><sup>2-</sup> is well studied,<sup>1,2</sup> including in D<sub>2</sub>O solution,<sup>3</sup> and the peak intensities are known to increase linearly with concentration over the relevant range (0.01 – 0.1 M). The CO<sub>3</sub><sup>2-</sup> concentration of each solution was therefore determined from the area of the fitted symmetric C-O stretching ( $a_1'$ ) band. This was observed at 1067 cm<sup>-1</sup> (FWHM = 9.5 cm<sup>-1</sup>) in H<sub>2</sub>O solution and 1065 cm<sup>-1</sup> (FWHM = 8.8 cm<sup>-1</sup>) in D<sub>2</sub>O solution (Figure S2A),<sup>1,3</sup> and was linear over the entire concentration range measured (3.125 mM – 100 mM, Figure S2B), consistent with previous reports.<sup>3</sup> To generate the calibration solutions sufficient NaOH (or NaOD) was added to a 100 mM Na<sub>2</sub>CO<sub>3</sub> solution to ensure complete conversion to CO<sub>3</sub><sup>2-</sup>, as determined from the absence of the  $\nu(\text{C-OH})$  band from HCO<sub>3</sub><sup>-</sup> at 1016 cm<sup>-1</sup>.<sup>1</sup> This provided the 100 mM calibration solution, which was then subject to serial dilution with H<sub>2</sub>O or D<sub>2</sub>O to generate 50, 25, 12.5, 6.25 and 3.125 mM solutions. The continued absence of the  $\nu(\text{C-OH})$  band in all spectra confirmed that dilution did not affect the speciation. A 4<sup>th</sup> order polynomial was fitted as a baseline and the  $a_1'$  band was fitted to a Voigt function to determine the band area. The area was then plotted as a function of concentration and fitted with a straight line to produce the calibration plot (Figure S2B). The method was validated using 3 repeat measurements from independently prepared H<sub>2</sub>O solutions (Figure S2B, inset) which suggests measured concentrations have an uncertainty (95% prediction band, PB) of 3 mM.

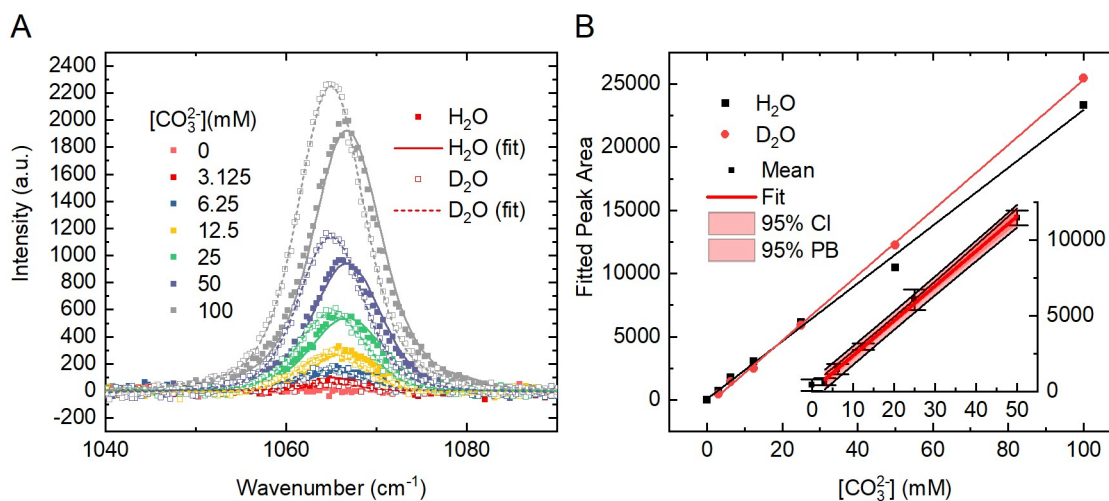

Figure S2: Calibration plots for the estimation of CO<sub>3</sub><sup>2-</sup> concentration in H<sub>2</sub>O and D<sub>2</sub>O solutions from Raman spectroscopy. A: Baseline-subtracted experimental data (points) and Voigt fits (lines) for CO<sub>3</sub><sup>2-</sup> concentrations between 0 and 100 mM in H<sub>2</sub>O and D<sub>2</sub>O. B: Fitted area as a function of concentration in H<sub>2</sub>O and D<sub>2</sub>O. Inset: Repeat measurements over range of interest with error bars showing 1 standard deviation and the 95% confidence band (CB) and 95% prediction band (PB).

A similar procedure was then used on the experimental solutions, with peak fitting used to separate the relative contributions of HCO<sub>3</sub><sup>-</sup> and CO<sub>3</sub><sup>2-</sup> to the spectrum. Example spectra showing these fits at two of the pH values are shown in Figure S3. Note the redshift of the  $\nu(\text{C-OH})$  band and appearance of the  $\delta(\text{COD})$  deformation band (1035 cm<sup>-1</sup>) from HCO<sub>3</sub><sup>-</sup> in

D<sub>2</sub>O.<sup>2</sup> To account for variation in laser power (and therefore in absolute intensities) a new calibration was used each day, with later calibrations using 3 points. Concentrations predicted based on the three point calibrations were found to have a relative error of  $<\pm 30\%$  at the 95% confidence level.

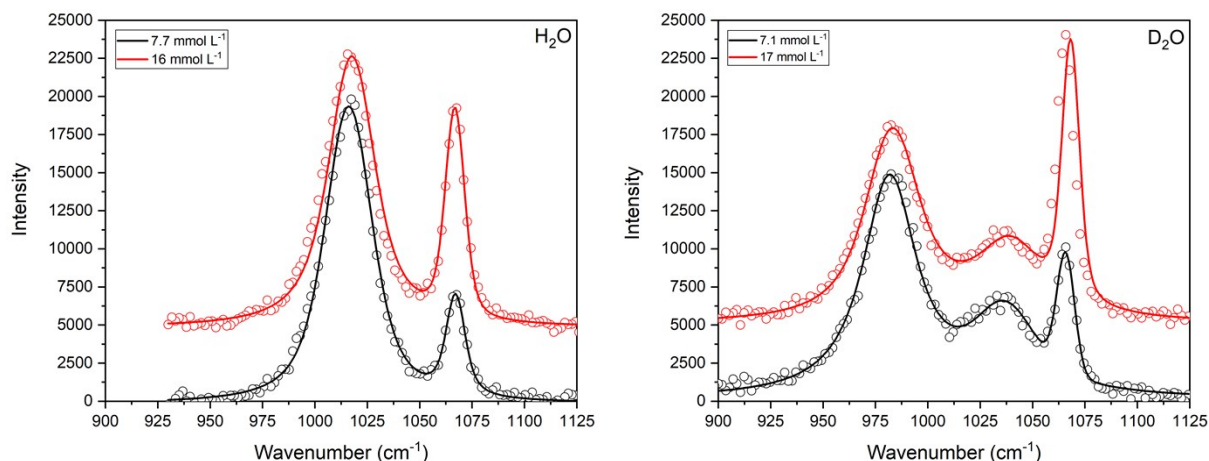

Figure S3: Raman spectra at different pH values. Left: Fitted spectra of two H<sub>2</sub>O solutions of different carbonate concentrations. Right: Fitted spectra of two D<sub>2</sub>O solutions of different carbonate concentrations, matched to the H<sub>2</sub>O concentrations. In each case 2 (H<sub>2</sub>O) or 3 (D<sub>2</sub>O) Voigt functions (lines) were fitted to the experimental data (circles) to determine the CO<sub>3</sub><sup>2-</sup> concentration.

### S3. STEM images of Nanopipettes

Nanopipettes were imaged using scanning transmission electron microscopy (STEM). Due to the narrow wall thickness at the tapered end, this method is able to probe inside the nanopipette to a distance of several microns from the end. Control experiments reveal that in the absence of precipitation no significant contrast is observed inside the nanopipette, even when the nanopipette was filled with solution (Figure S4). Images of the nanopipettes used in the experiments reported in the main text are shown in Table 1. A lookup table was used to colour the images to highlight subtle variation in contrast. Absences in the table indicate instances where damage during retrieval or vacuum drying prevented imaging.

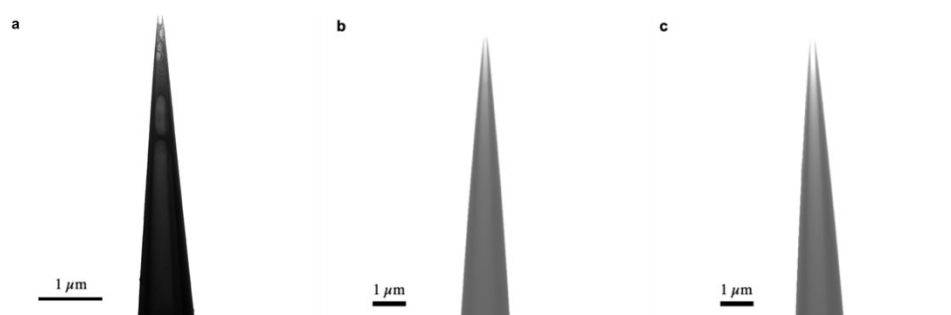

Figure S4: Three nanopipettes after being submerged in ethanol and freeze-dried. a) Example of a nanopipette where a precipitate has formed. b) Nanopipette that was filled with NaHCO<sub>3</sub> solution and submerged in CaCl<sub>2</sub> solution, but underwent no electrochemical mixing. c) Nanopipette that was not filled with or submerged in any solution.

**Table S1** STEM images of nanopipettes following precipitation experiments

| Tip Number | D <sub>2</sub> O (7.1 mM)                                                           | H <sub>2</sub> O (7.7 mM)                                                             |
|------------|-------------------------------------------------------------------------------------|---------------------------------------------------------------------------------------|
| 1          | 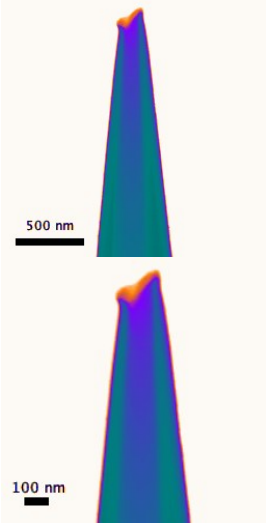   |                                                                                       |
| 2          |   |   |
| 3          |  |  |

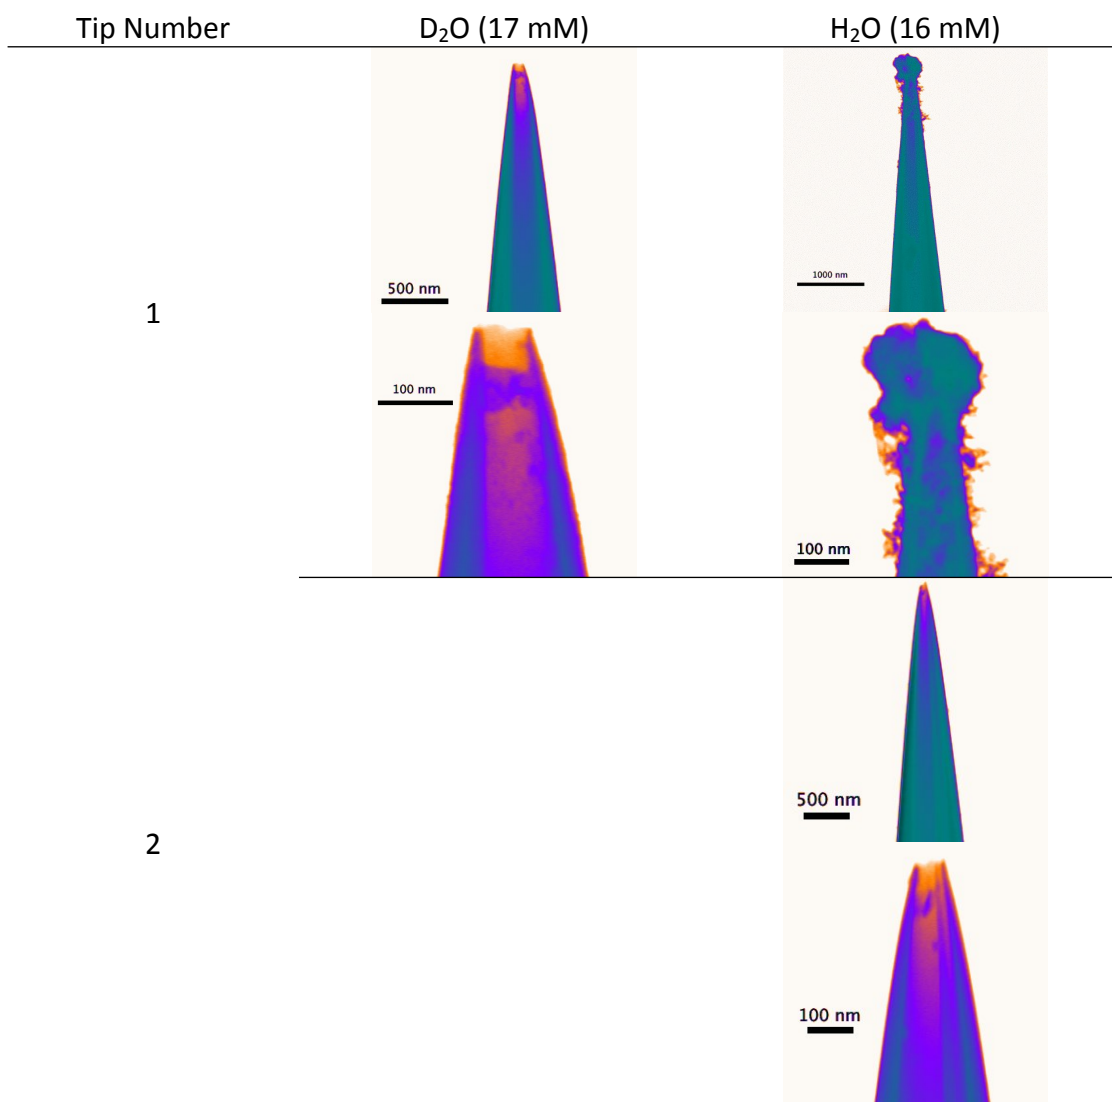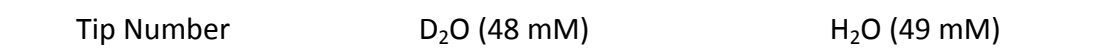

1

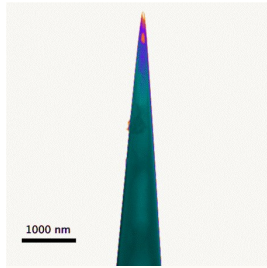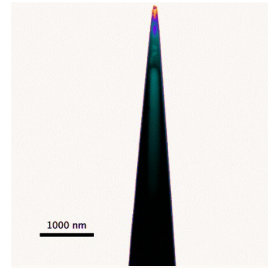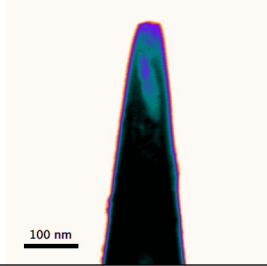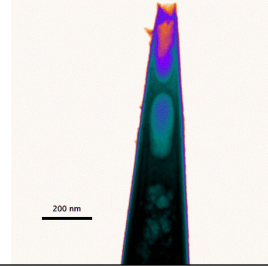

2

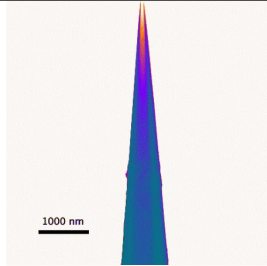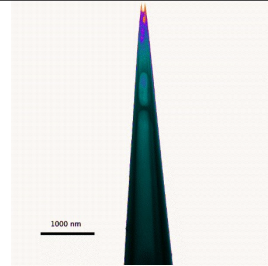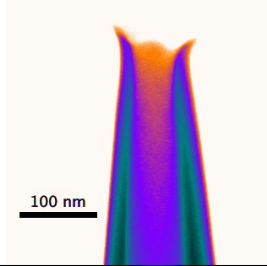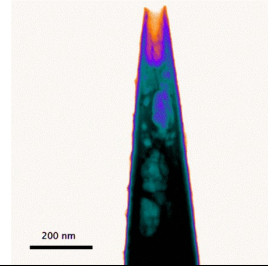

3

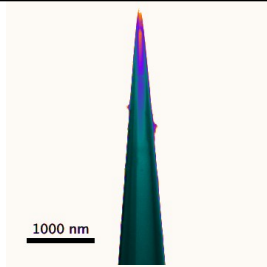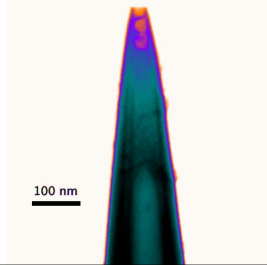

#### S4. Raman spectrum of nanopipette after precipitation

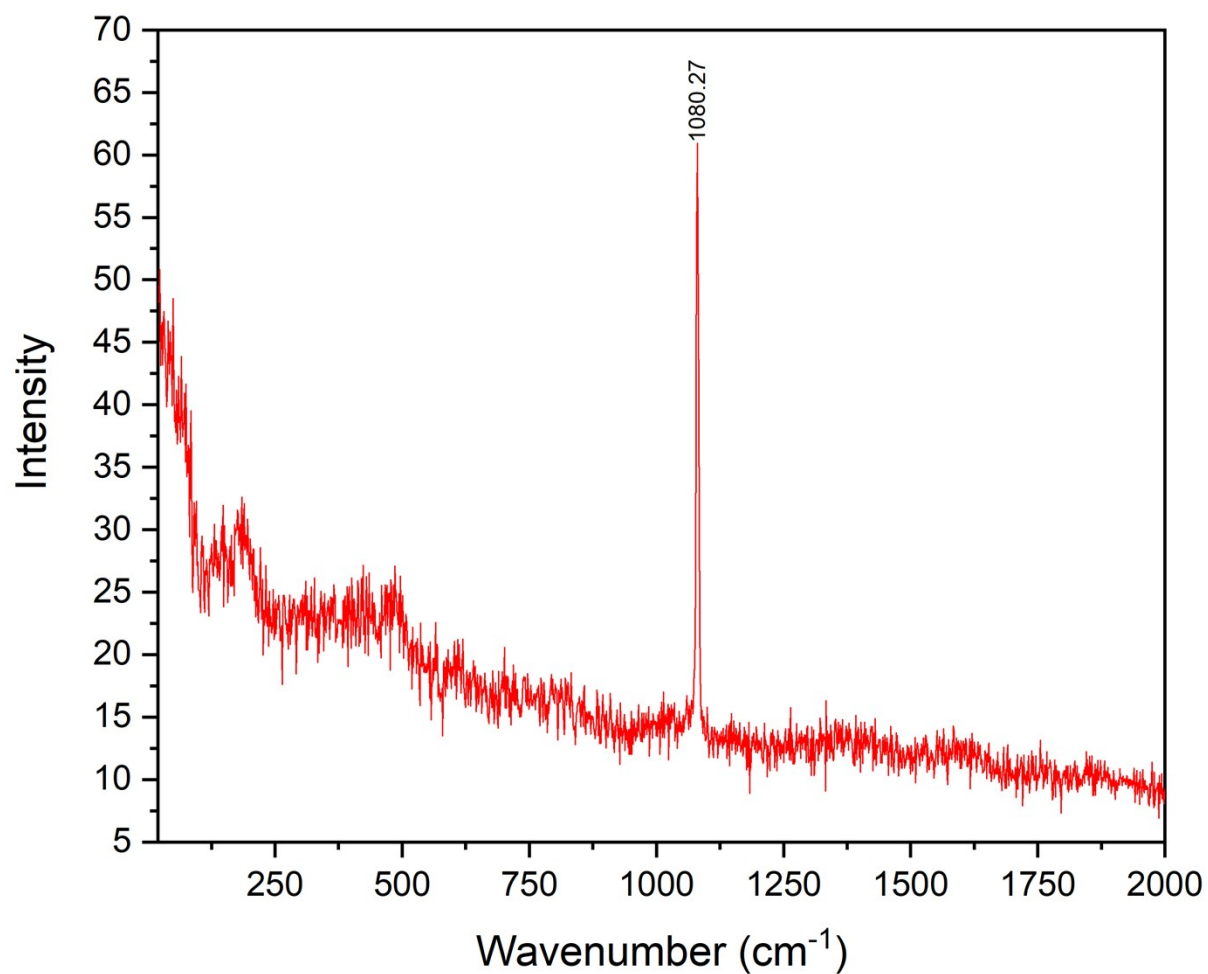

Figure S5: Raman spectrum of the end of a nanopipette after precipitation. Filling solution:  $[\text{CO}_3^{2-}] = 48 \text{ mM}$ , bath solution:  $[\text{Ca}^{2+}] = 20 \text{ mM}$ . Spectrum is the averaged result of 10 exposures of 2 s.



## S5. Evaluation of the role of mass transport control in precipitation

To determine whether precipitation was controlled by kinetics or mass transport, the flux of  $\text{Ca}^{2+}$  was estimated from the total current and compared to the amount of  $\text{Ca}^{2+}$  ions estimated to form the ACC plug observed in STEM images (Figure S6). Given a conservative estimate of the Debye length under these type of conditions (0.96 nm for a 100 mM  $\text{NaHCO}_3$  solution), and a conservative characteristic length scale of 15 nm (i.e. a pipette radius), the pipette walls should have little effect on the mass transport and conventional, rather than nanoscopic, mass transport can be considered.<sup>4</sup>

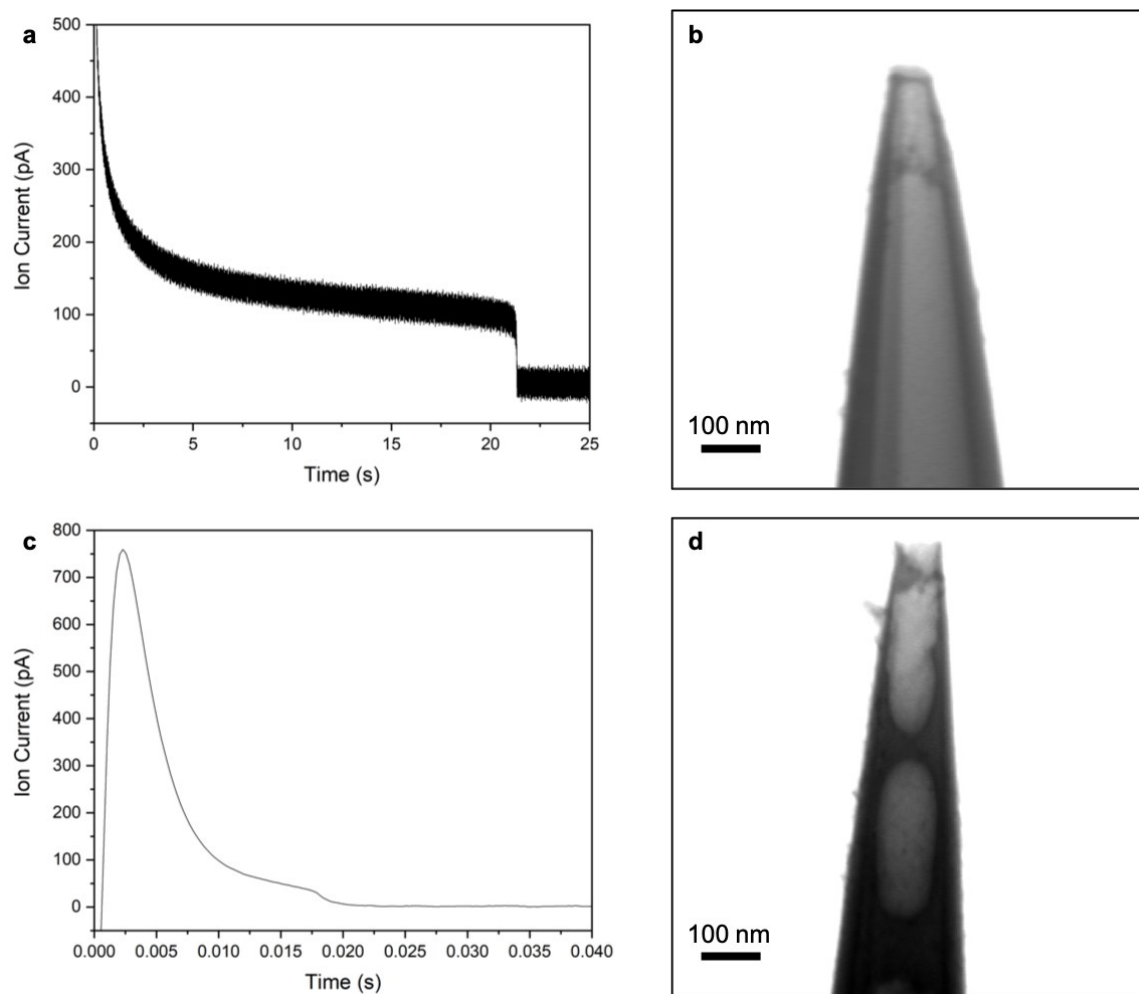

Figure S6: a) Current transient and b) STEM image of precipitate following blocking at  $[\text{CO}_3^{2-}] = 7.7 \text{ mM}$  (reproduced from Figure 2A, main text). c) Current transient and d) STEM image of precipitate following blocking at  $[\text{CO}_3^{2-}] = 49 \text{ mM}$  (reproduced from Tip 1,  $[\text{CO}_3^{2-}] = 49 \text{ mM}$   $\text{H}_2\text{O}$ , Table S1 above).

The  $\text{Ca}^{2+}$  flux into the pipette,  $j_{\text{Ca}^{2+}}$ , can be estimated from the total current,  $i_{\text{total}}$ , and the transference number for  $\text{Ca}^{2+}$  in  $\text{CaCl}_2$ ,  $t_{\text{Ca}^{2+}}$ , (Equations S1, S2) where  $F$  is Faraday's constant ( $F = 96\,485 \text{ C mol}^{-1}$ ). At  $25^\circ\text{C}$ , in  $20 \text{ mM CaCl}_2$   $t_{\text{Ca}^{2+}} = 0.42$ .<sup>5</sup>

$$j_{\text{Ca}^{2+}} = \frac{i_{\text{total}} t_{\text{Ca}^{2+}}}{2F} \quad (\text{S1})$$

$$t_{Ca^{2+}} = \frac{i_{Ca^{2+}}}{i_{total}} \quad (S2)$$

The total amount of  $Ca^{2+}$  transferred,  $n_{Ca^{2+}}$ , can therefore be found by integrating the current over the induction time and multiplying by the transference number (Equation S3).

$$n_{Ca^{2+}} = \frac{t_{Ca^{2+}}}{2F} \int_0^{t_{ind}} i_{total}(t) dt \quad (S3)$$

By integrating the area under the curve shown in Fig S6a for  $[CO_3^{2-}] = 7.7$  mM, ( $3.11 \times 10^{-9}$  C) and using Equation S3, the value of  $n_{Ca^{2+}}$  is  $6.77 \times 10^{-15}$  mol. The radius of the precipitate inside the nanopipette (Figure S6b, 42 nm) gives an approximate volume (assuming a sphere) of  $3.13 \times 10^{-22}$  m<sup>3</sup>. From this, we can calculate the mass of the sphere ( $5.94 \times 10^{-16}$  g) from the literature value of the density of ACC ( $1.9$  g cm<sup>-3</sup>),<sup>6</sup> and an assumed formula weight ( $CaCO_3 \cdot H_2O$ ,  $118$  g mol<sup>-1</sup>), the amount of  $Ca^{2+}$  within the plug is estimated to be  $5.52 \times 10^{-18}$  mol. This is significantly less than the number of ions being delivered to the nanopipette, indicating that the growth of ACC is not limited by mass transport, but is instead kinetically limited.

Repeating the above process for a system where  $[CO_3^{2-}] = 48$  mM (shown in Figures S6c and S6d), where the charge passed is  $4.04 \times 10^{-12}$  C, yields  $n_{Ca^{2+}} = 8.79 \times 10^{-18}$  mol – compared to the estimated amount of  $Ca^{2+}$  in the plug,  $2.60 \times 10^{-18}$  mol. These values are close, given the approximations involved, and in comparison to those of the  $[CO_3^{2-}] = 7.7$  mM case, where there were three orders of magnitude difference between amount of  $Ca^{2+}$  in the volume of precipitate and the amount of  $Ca^{2+}$  being delivered. This suggests that the reaction tends towards being mass transport limited at higher pH values and faster induction times.

## S6. Induction time data

**Table S2** Induction times and derived nucleation parameters for the individual nanopipettes

| [CO <sub>2</sub> <sup>2-</sup> ] (mM) | Pipette | $t_{ind}$ (s)                       |       |                  |       |          |                  | $t_g$ (s) |          |                  |       | $J \cdot V$ (m <sup>-3</sup> s <sup>-1</sup> · m <sup>3</sup> ) |        |                  |       |                  |
|---------------------------------------|---------|-------------------------------------|-------|------------------|-------|----------|------------------|-----------|----------|------------------|-------|-----------------------------------------------------------------|--------|------------------|-------|------------------|
|                                       |         | H <sub>2</sub> O (D <sub>2</sub> O) |       | H <sub>2</sub> O | S.D.  | <i>N</i> | D <sub>2</sub> O | S.D.      | <i>N</i> | H <sub>2</sub> O | S.E.  | D <sub>2</sub> O                                                | S.E.   | H <sub>2</sub> O | S.E.  | D <sub>2</sub> O |
| 7.7<br>(7.1)                          | 1       | 11.2                                | 2.28  | 51               | 4.873 | 3.308    | 50               | 9.048     | 0.561    | 1.215            | 0.121 | 0.336                                                           | 0.107  | 0.272            | 0.013 |                  |
|                                       | 2       | 18.4                                | 4.14  | 49               | 9.907 | 4.945    | 46               | 8.964     | 1.346    | 4.320            | 0.110 | 0.061                                                           | 0.075  | 0.215            | 0.006 |                  |
|                                       | 3       |                                     |       |                  | 9.656 | 2.615    | 50               |           |          | 5.718            | 0.782 |                                                                 |        | 0.196            | 0.047 |                  |
|                                       | Mean    | 14.8                                |       |                  | 8.145 |          |                  | 9.006     |          | 3.751            |       |                                                                 | 0.1985 |                  | 0.228 |                  |
|                                       | S.E.M   | 3.63                                |       |                  | 2.316 |          |                  | 0.042     |          | 1.882            |       |                                                                 | 0.1375 |                  | 0.032 |                  |
| 15.8<br>(16.7)                        | 1       | 5.92                                | 2.15  | 48               | 1.666 | 1.273    | 50               | 2.21      | 0.3      | 0.483            | 0.155 | 0.234                                                           | 0.027  | 0.889            | 0.176 |                  |
|                                       | 2       | 1.43                                | 0.188 | 50               | 3.745 | 1.555    | 49               | 1.12      | 0.001    | 3.125            | 3.48  | 5.294                                                           | 0.085  | 0.667            | 6.184 |                  |
|                                       | 3       | 0.95                                | 0.326 | 43               | 2.381 | 0.582    | 50               | 0.534     | 0.011    | 1.037            | 0.286 | 3.689                                                           | 0.219  | 0.595            | 0.19  |                  |
|                                       | Mean    | 2.77                                |       |                  | 2.597 |          |                  | 1.288     |          | 1.548            |       | 3.072                                                           |        | 0.717            |       |                  |
|                                       | S.E.M.  | 2.24                                |       |                  | 0.863 |          |                  | 0.694     |          | 1.138            |       | 2.111                                                           |        | 0.125            |       |                  |
| 36.4<br>(36.3)                        | 1       | 0.133                               | 0.023 | 51               | 0.101 | 0.018    | 51               | 0.095     | 0.009    | 0.056            | 0.003 | 22                                                              | 6      | 29               | 3     |                  |
|                                       | 2       | 0.321                               | 0.065 | 51               | 0.105 | 0.028    | 51               | 0.236     | 0.007    | 0.066            | 0     | 11                                                              | 1      | 34               | 1     |                  |
|                                       | 3       | 0.202                               | 0.051 | 51               | 0.093 | 0.026    | 51               | 0.141     | 0.003    | 0.077            | 0.002 | 16                                                              | 1      | 59               | 7     |                  |
|                                       | Mean    | 0.219                               |       |                  | 0.100 |          |                  | 0.157     |          | 0.066            |       | 16.333                                                          |        | 40.667           |       |                  |
|                                       | S.E.M.  | 0.078                               |       |                  | 0.005 |          |                  | 0.059     |          | 0.009            |       | 4.497                                                           |        | 13.123           |       |                  |
| 48.8<br>(47.8)                        | 1       | 0.027                               | 0.007 | 51               |       |          |                  | 0.018     | 0.001    |                  |       | 94                                                              | 12     |                  |       |                  |
|                                       | 2       | 0.027                               | 0.003 | 51               | 0.057 | 0.007    | 51               | 0.022     | 0.002    | 0.047            | 0.001 | 188                                                             | 88     | 168              | 43    |                  |
|                                       | 3       | 0.038                               | 0.005 | 51               | 0.048 | 0.003    | 51               | 0.031     | 0.00     | 0.042            | 0.001 | 152                                                             | 12     | 195              | 75    |                  |
|                                       | Mean    | 0.031                               |       |                  | 0.052 |          |                  | 0.024     |          | 0.044            |       | 145                                                             |        | 164              |       |                  |
|                                       | S.E.M.  | 0.005                               |       |                  | 0.005 |          |                  | 0.005     |          | 0.002            |       | 39                                                              |        | 28               |       |                  |

S.D. = standard deviation, S.E. = standard error, S.E.M. = standard error of the means, *N* = number of events

## S7. Finite element method simulation of nanopipette mass transport

The model used to simulate the time dependent mixing of the nanopipette and bath solutions was similar to that reported previously.<sup>7</sup> An axisymmetric geometry was constructed based on a 50  $\mu\text{m}$  spherical domain representing the bath, with the nanopipette geometry (based on STEM images) cut out (Figure S7). The model assumes speciation based on the PHREEQC database,<sup>8</sup> and considers the transport of the 12 most significant species (Table 3). Flux of the  $i$ th species,  $J_i$ , at concentration  $c_i$ , is calculated using the Nernst-Planck equation (Equation S4), while the electrical potential,  $V$ , satisfies the Poisson equation (Equation S5), where  $R$  is the molar gas constant ( $8.314 \text{ J K}^{-1} \text{ mol}^{-1}$ ) and  $T$  is the temperature. Equilibria between the species (Table 4) are maintained by the continuity equation (Equation S6), where  $R_i$  is the reaction flux based on the forward and backward components of the equilibrium reaction with a suitable rate constant (Table 4). Equilibrium constants were based on the local species activity  $a_i$  (Equation S7), calculated from the activity coefficient  $\gamma_i$  based on the local ionic strength,  $I$  (Equation S8) using the Davies equation (Equation S9) with  $A=1.82 \times 10^6 (\text{eT})^{-3/2}$ . For charged species  $b = 0.3$ , for uncharged species  $b = 0.1$ .

$$j_i = -D_i \nabla c_i - z_i \frac{F}{RT} D_i c_i \nabla V \quad (\text{S4})$$

$$\nabla^2 V = -\frac{F}{\epsilon \epsilon_0} \sum_i z_i c_i \quad (\text{S5})$$

$$\frac{\partial c_i}{\partial t} + \nabla \cdot j_i = R_i \quad (\text{S6})$$

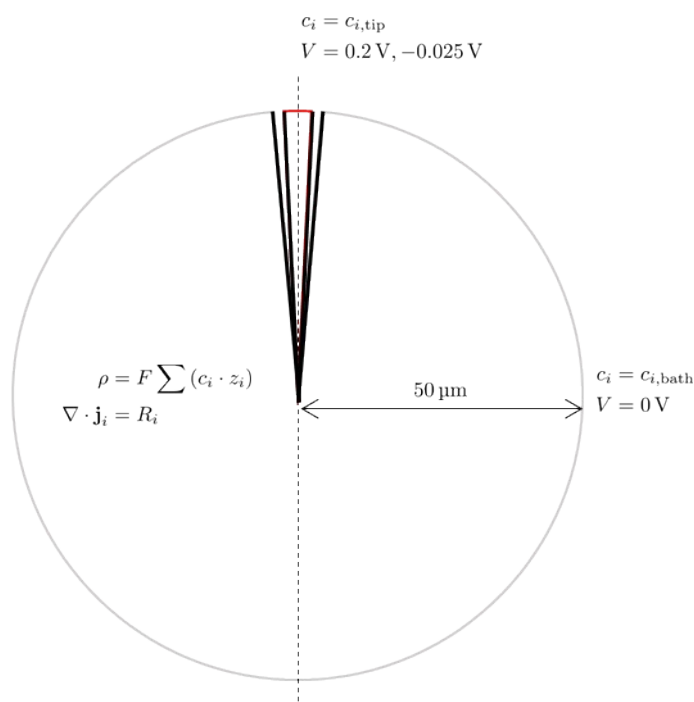

Figure S7: Illustration of the simulation domain used.

$$a_i = \gamma_i c_i \quad (S7)$$

$$I = \frac{1}{2} \sum z_i^2 c_i \quad (S8)$$

$$\log_{10} \gamma_i = -Az_i^2 \left( \frac{\sqrt{I}}{1 + \sqrt{I}} - bI \right) \quad (S9)$$

Boundary concentrations were fixed at the equilibrium values determined for a 100 mM NaHCO<sub>3</sub> solution containing 1 μM CaCl<sub>2</sub> (nanopipette) or a 20 mM CaCl<sub>2</sub> solution containing 1 μM NaHCO<sub>3</sub> (bath). The inclusion of small amounts of the nanopipette/bath solution avoided zero values when determining equilibria. As the Raman measurement gave the total CO<sub>3</sub><sup>2-</sup> concentration (ΣCO<sub>3</sub><sup>2-</sup>), both free and ion-paired, the effective pH of each solution was determined iteratively in PHREEQC to obtain self-consistent species concentrations. Initially the model was solved with the unblocking potential (+0.2 V) applied but without imposing the equilibrium fluxes. This solution was then used to provide the initial values for the model with equilibrium fluxes. A time dependent solution was then sought for the case with the blocking potential (-0.025 V) applied, using the unblocking potential solution as the initial value. The supersaturation, *S*, was evaluated over the whole model at each time point.

To evaluate the effect of D<sub>2</sub>O on mass transport and supersaturation the following changes were made to the model. All diffusion coefficients were adjusted with the ratio  $D(\text{H}_2\text{O}) = 1.23 D(\text{D}_2\text{O})$ .<sup>9</sup> The dissociation constant for DCO<sub>3</sub> was taken to be 11.078 ( $\text{p}K_a^{\text{D}} = \text{p}K_a^{\text{H}} + 0.748$ ).<sup>10</sup> The ionic product of D<sub>2</sub>O was taken to be  $0.154 \times 10^{-14}$  ( $\text{p}K_w^{\text{D}} = 14.812$ ).<sup>11</sup> The other equilibrium constants were not modified as the data were unavailable.

**Table S3** Diffusion coefficients and boundary conditions applied in the FEM model

| Species                   | $D$<br>( $10^{-5} \text{ cm}^2 \text{ s}^{-1}$ ) | Bath<br>( $\text{mmol L}^{-1}$ ) | Nanopipette<br>( $\text{mmol L}^{-1}$ ) |                       |                       |                       |
|---------------------------|--------------------------------------------------|----------------------------------|-----------------------------------------|-----------------------|-----------------------|-----------------------|
| $\Sigma \text{CO}_3^{2-}$ |                                                  |                                  | <b>7.67</b>                             | <b>15.79</b>          | <b>36.51</b>          | <b>49.06</b>          |
| $\text{CO}_3^{2-}$        | 0.923                                            | $4.83 \times 10^{-7}$            | 4.55                                    | 9.25                  | 20.87                 | 27.64                 |
| $\text{NaCO}_3^*$         | 1.2                                              | $3.81 \times 10^{-12}$           | 3.14                                    | 6.54                  | 15.64                 | 21.42                 |
| $\text{Ca}^{2+}$          | 0.792                                            | 20                               | $4.14 \times 10^{-4}$                   | $3.03 \times 10^{-4}$ | $1.93 \times 10^{-4}$ | $1.64 \times 10^{-4}$ |
| $\text{Cl}^-$             | 2.05                                             | 40                               | $2 \times 10^{-3}$                      |                       |                       |                       |
| $\text{Na}^+$             | 1.334                                            | $7.735 \times 10^{-4}$           | 101.3                                   | 106.3                 | 118.6                 | 125.8                 |
| $\text{H}_2\text{CO}_3$   | 1.92                                             | $1.71 \times 10^{-4}$            | $2.97 \times 10^{-1}$                   | $1.23 \times 10^{-1}$ | $3.15 \times 10^{-1}$ | $1.54 \times 10^{-1}$ |
| $\text{HCO}_3^-$          | 1.185                                            | $7.4 \times 10^{-4}$             | 89.02                                   | 81.25                 | 61.15                 | 49                    |
| $\text{H}^+$              | 9.311                                            | $1.628 \times 10^{-4}$           | $2.61 \times 10^{-6}$                   | $1.20 \times 10^{-6}$ | $4.26 \times 10^{-7}$ | $2.65 \times 10^{-7}$ |
| $\text{OH}^-$             | 5.273                                            | $9.43 \times 10^{-5}$            | $6.90 \times 10^{-3}$                   | $1.53 \times 10^{-2}$ | $4.49 \times 10^{-2}$ | $7.37 \times 10^{-2}$ |
| $\text{NaHCO}_3^{0*}$     | 0.673                                            | $2.09 \times 10^{-10}$           | 2.995                                   | 2.828                 | 2.301                 | 1.924                 |
| $\text{CaHCO}_3^{+*}$     | 0.506                                            | $1.13 \times 10^{-4}$            | $1.72 \times 10^{-6}$                   | $1.12 \times 10^{-6}$ | $5.13 \times 10^{-5}$ | $3.38 \times 10^{-5}$ |
| $\text{CaCO}_3^{0*}$      | 0.446                                            | $2.75 \times 10^{-6}$            | $4.14 \times 10^{-4}$                   | $5.85 \times 10^{-4}$ | $7.56 \times 10^{-4}$ | $8.03 \times 10^{-4}$ |

\* Taken from the updated Amm.dat database, originally calculated using the Pikal formula<sup>8</sup>

**Table S4** Chemical equilibria considered in FEM model

| Constants      | Reaction                                                               | pK     | $k_b$                                    |
|----------------|------------------------------------------------------------------------|--------|------------------------------------------|
| $K2 = kf2/kb2$ | $\text{H}_2\text{CO}_3 \rightleftharpoons \text{HCO}_3^- + \text{H}^+$ | 6.351  | $10^6 \text{ L mol}^{-1} \text{ s}^{-1}$ |
| $K3 = kf3/kb3$ | $\text{HCO}_3^- \rightleftharpoons \text{CO}_3^{2-} + \text{H}^+$      | 10.330 | $10^6 \text{ L mol}^{-1} \text{ s}^{-1}$ |
| $K4 = kf4/kb4$ | $\text{Ca}^{2+} + \text{HCO}_3^- \rightleftharpoons \text{CaHCO}_3^+$  | -1.015 | $10^6 \text{ s}^{-1}$                    |
| $K5 = kf5/kb5$ | $\text{Ca}^{2+} + \text{CO}_3^{2-} \rightleftharpoons \text{CaCO}_3^0$ | -3.224 | $10^6 \text{ s}^{-1}$                    |
| $K6 = kf6/kb6$ | $\text{Na}^+ + \text{CO}_3^{2-} \rightleftharpoons \text{NaCO}_3^-$    | -1.270 | $10^6 \text{ s}^{-1}$                    |
| $K7 = kf7/kb7$ | $\text{Na}^+ + \text{HCO}_3^- \rightleftharpoons \text{NaHCO}_3^0$     | 0.25   | $10^6 \text{ s}^{-1}$                    |
| $Kw = kfw/kbw$ | $\text{H}_2\text{O} \rightleftharpoons \text{H}^+ + \text{OH}^-$       | 13.997 | $10^9 \text{ L mol}^{-1} \text{ s}^{-1}$ |

**Table S5** Local flux of species from equilibrium reactions

| Species, $i$                                | Reaction flux, $R_i$                                                                                                                                                                                                      |
|---------------------------------------------|---------------------------------------------------------------------------------------------------------------------------------------------------------------------------------------------------------------------------|
| $\text{Ca}^{2+}$                            | $kb5([\text{CaCO}_3] - K5[\text{Ca}][\text{CO}_3]) + kb4([\text{CaHCO}_3] - K4[\text{Ca}][\text{HCO}_3])$                                                                                                                 |
| $\text{Na}^+$                               | $kb6([\text{NaCO}_3] - K6[\text{Na}][\text{CO}_3]) + kb7([\text{NaHCO}_3] - K7[\text{Na}][\text{HCO}_3])$                                                                                                                 |
| $\text{H}_2\text{CO}_3$ (as $\text{CO}_2$ ) | $kb2([\text{H}][\text{HCO}_3] - K2[\text{H}_2\text{CO}_3])$                                                                                                                                                               |
| $\text{HCO}_3^-$                            | $kb2(K2[\text{H}_2\text{CO}_3] - [\text{H}][\text{HCO}_3]) + kb3([\text{H}][\text{CO}_3] - K3[\text{HCO}_3]) + kb4([\text{CaHCO}_3] - K4[\text{Ca}][\text{HCO}_3]) + kb7([\text{NaHCO}_3] - K7[\text{Na}][\text{HCO}_3])$ |
| $\text{CO}_3^{2-}$                          | $kb3(K3[\text{HCO}_3] - [\text{H}][\text{CO}_3]) + kb5([\text{CaCO}_3] - K5[\text{Ca}][\text{CO}_3]) + kb6([\text{NaCO}_3] - K6[\text{Na}][\text{CO}_3])$                                                                 |
| $\text{H}^+$                                | $kbw(Kw - [\text{H}][\text{OH}]) + kb2(K2[\text{H}_2\text{CO}_3] - [\text{H}][\text{HCO}_3]) + kb3(K3[\text{HCO}_3] - [\text{H}][\text{CO}_3])$                                                                           |
| $\text{OH}^-$                               | $kbw(Kw - [\text{H}][\text{OH}])$                                                                                                                                                                                         |
| $\text{NaHCO}_3^0$                          | $kb7(K7[\text{Na}][\text{HCO}_3] - [\text{NaHCO}_3])$                                                                                                                                                                     |
| $\text{NaCO}_3^-$                           | $kb6(K6[\text{Na}][\text{CO}_3] - [\text{NaCO}_3])$                                                                                                                                                                       |
| $\text{CaHCO}_3^+$                          | $kb4(K4[\text{Ca}][\text{HCO}_3] - [\text{CaHCO}_3])$                                                                                                                                                                     |
| $\text{CaCO}_3^0$                           | $kb5(K5[\text{Ca}][\text{CO}_3] - [\text{CaCO}_3])$                                                                                                                                                                       |

Examination of  $S$  after 10 s reveals that high values are only observed at the very tip of the nanopipette (Figure S8), justifying the size of the simulation domain. Closer examination of the tip region reveals the maximum supersaturation increases over the course of the first 100 ms, before stabilising. After this time, the supersaturated region then continues to expand up into the pipette, but not into solution, highlighting the more efficient mass transport into the nanopipette than out of it. The steady state supersaturation profile along the centreline of the nanopipette can also be examined (Figure S9d). The position of maximum supersaturation remains relatively similar for all four concentrations, occurring where the  $\text{Ca}^{2+}:\text{CO}_3^{2-}$  ratio is close to 1.

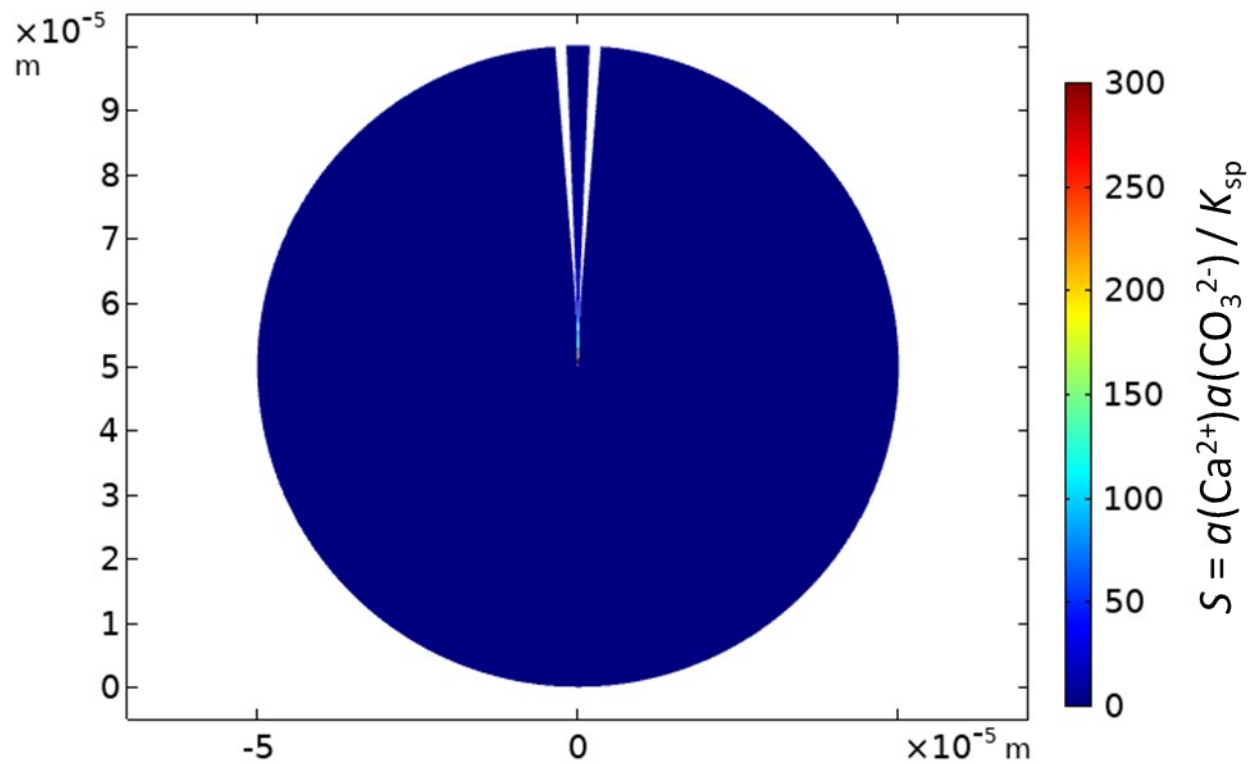

Figure S8: Saturation calculated over the whole simulation domain after 10 s.

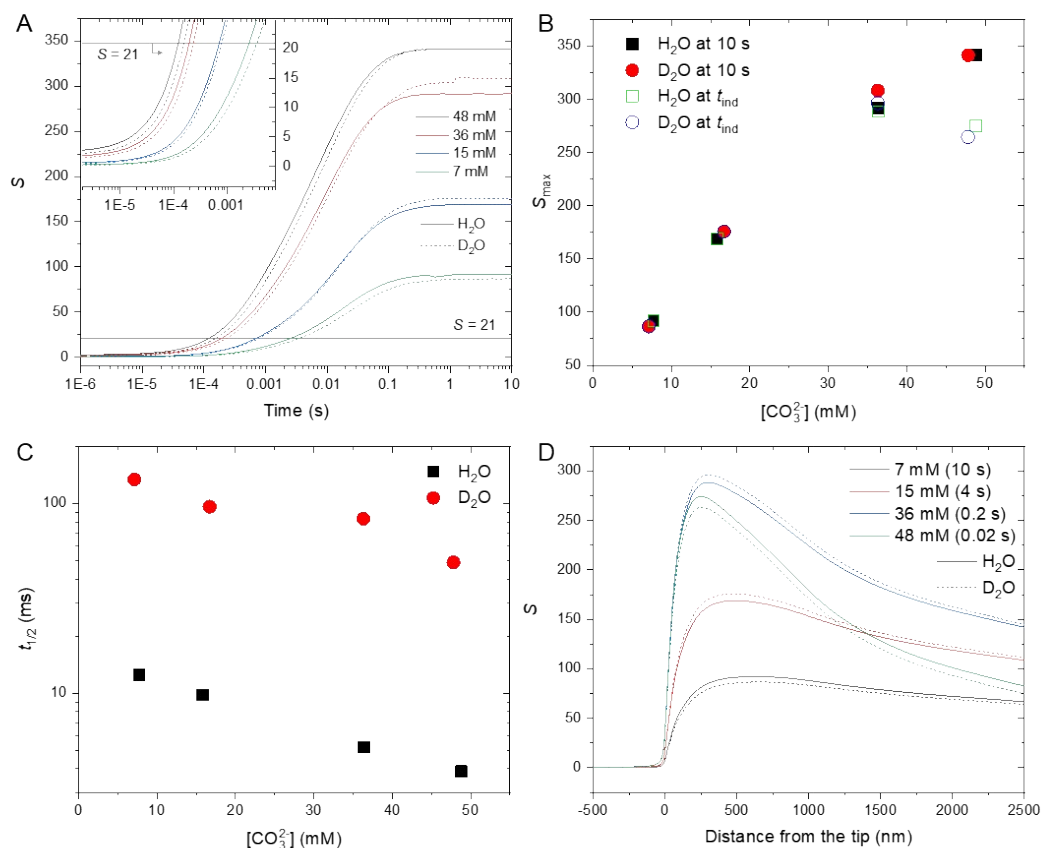

Figure S9: Simulated mixing of  $\text{CaCl}_2$  and  $\text{NaHCO}_3$  at the four  $\text{CO}_3^{2-}$  concentrations of interest in  $\text{H}_2\text{O}$  and  $\text{D}_2\text{O}$ . (A) Time dependence of the value of maximum  $S$ . (B) Value of maximum  $S$  after 10 s (the length of the simulation, and at the observed  $t_{\text{ind}}$  except 7 mM where 10 s is used again). (C) The half rise time,  $t_{1/2}$ , of  $S$  to its maximum value after 10 s. (D) The variation of  $S$  along the nanopipette axis at  $t_{\text{ind}}$ .



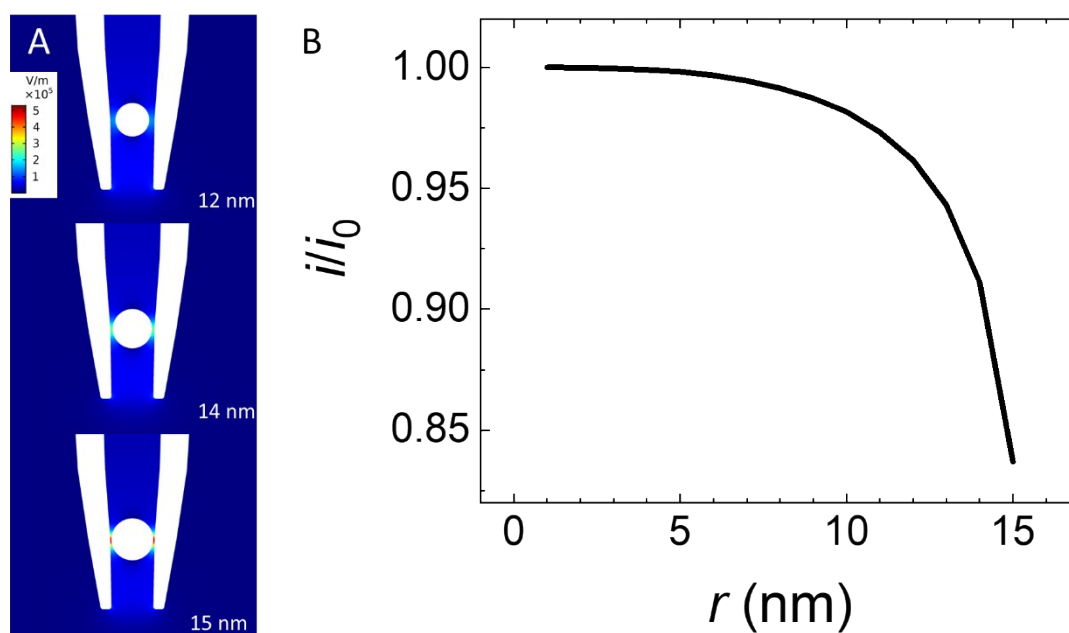

Figure S10: Effect of growing particle on the ion current in a nanopipette. (A) Magnitude of the electric field around particles of different radii (nanopipette radius at particle location is 15.75 nm) (B) Effect of particle radius on normalised current (relative to value for 1 nm particle).

## S8. References

- 1 W. W. Rudolph, G. Irmer and E. Königsberger, *Dalton Trans.*, 2008, **0**, 900–908.
- 2 W. W. Rudolph, D. Fischer and G. Irmer, *Applied Spectroscopy*, 2006, **60**, 130–144.
- 3 B. G. Oliver and A. R. Davis, *Can. J. Chem.*, 1973, **51**, 698–702.
- 4 M. Tagliazucchi and I. Szleifer, *Materials Today*, 2015, **18**, 131–142.
- 5 A. G. Keenan, H. G. McLeod and A. R. Gordon, *The Journal of Chemical Physics*, 1945, **13**, 466–469.
- 6 F. Konrad, F. Gallien, D. E. Gerard and M. Dietzel, *Crystal Growth and Design*, 2016, **16**, 6310–6317.
- 7 D. Perry, A. S. Parker, A. Page and P. R. Unwin, *ChemElectroChem*, 2016, **3**, 2212–2220.
- 8 D. L. Parkhurst and C. A. J. Appelo, *Description of input and examples for PHREEQC version 3: a computer program for speciation, batch-reaction, one-dimensional transport, and inverse geochemical calculations*, Reston, VA, 2013.
- 9 P.-O. Gendron, F. Avaltroni and K. J. Wilkinson, *J Fluoresc.*, 2008, **18**, 1093.
- 10 M. Paabo and R. G. Bates, *J. Phys. Chem.*, 1969, **73**, 3014–3017.
- 11 R. W. Kingerley and V. K. LaMer, *J. Am. Chem. Soc.*, 1941, **63**, 3256–3262.
